# Supplementary material for: Prospective Newborn Screening for SCID in Germany: A First Analysis by the Pediatric Immunology Working Group (API)
Source: J Clin Immunol. 2023 Feb 27;43(5):965–78. doi: 10.1007/s10875-023-01450-6 (PMC9968632; doi:10.1007/s10875-023-01450-6)
Supplement: Supplementary file 2 — Supplementary file2 (XLSX 3470 KB) [file 10875_2023_1450_MOESM2_ESM.xlsx]

## Sheet: Tabelle1
Patient	Gestational Age	TREC Screening Result	Initial flow	Leukocytes	Lymphocytes	CD3+	CD4+	CD4+CD45RA+/µl	CD8+	CD19+ or CD20+	CD3-/CD16+/56+	Clinical diagnosis after CT	Genetic diagnosis	Gene with pathological variant	Pos. Family Hx	HSCT	Age at HSCT	Other intervention	Outcome
No.	(weeks)	(low / absent)	(MM/YYYY)	(/µl)	(/µl)	(/µl)	(/µl)	(/µl)	(/µl)	(/µl)	(/µl)				(yes/no)	(yes/no)	(months of life)
1	37	absent	09/2019	15630	782	2	0	0	2	756	43	SCID	yes	IL2RG	no	yes	2	-	alive and well, 27 months post Tx
2	37	absent	10/2019	3590	213	2	1	0	1	5	194	SCID	yes	ADA	yes	yes	2	ERT prior to HSCT	alive and well, 26 months post Tx
3	39	absent	11/2021	5200	1238	6	0	0	4	1185	31	SCID	yes	IL2RG	no	no	4	-	alive and well, 1 months post Tx
4	39	absent	09/2021	5300	200	120	66	0	60	20	40	SCID	yes	PNP	yes	no	-	chemotherapy	deceased
5	35	absent	09/2021	8500	5600	4432	1066	0	3254	898	281	SCID	yes	IL2RG	yes	yes	1.5		alive, sequelae from congenital CMV, 5 months post Tx
6	41	absent	09/2019	7660	881	0	0	0	0	5	809	SCID	yes	RAG1	no	yes	2	-	alive and well, 14 months post Tx
7	38	absent	11/2019	7800	1170	9	1	0	4	1013	13	SCID	yes	JAK3	no	yes	6	-	alive and well, 23 months post Tx
8	39	absent	05/2021	6550	871	6	1	1	0	617	7	SCID	yes	JAK3	no	yes	4	-	deceased, 6 months post Tx
9	41	absent	09/2019	10600	1995	36	47	23	52	1265	425	SCID	yes	BCL11B	no	yes	4	-	alive, neurological dificit from underlying disease, 24 months post Tx
10	40	absent	07/2020	21100	2500	46	1	0	34	2194	50	SCID	yes	JAK3	no	yes	2	-	alive and well, 16 months post Tx
11	36	absent	10/2020	2600	2140	109	101	5	4	465	1087	SCID	yes	NHEJ1	no	yes	4	-	alive and well, 8 months post Tx
12	39	absent	09/2021	5500	640	22	0	0	2	550	27	SCID	yes	JAK3	no	yes	3	-	alive and well, 3 months post Tx
13	38	low	10/2021	3100	0	0	0	0	0	0	0	SCID	yes	ADA	no	no	-	ERT, GT planned	alive, chronic CMV infection
14	39	absent	09/2019	6000	900	0	0	0	0	0	644	SCID	yes	DCLRE1C	yes	yes	3	-	alive and well, 27 months post Tx
15	40	absent	03/2020	8000	707	0	0	0	0	311	35	SCID	yes	JAK3	no	yes	4	-	alive and well, 18 months post Tx
16	34	absent	07/2021	3600	731	0	0	0	0	218	157	SCID	yes	IL7RA	no	yes	3	-	alive and well, 6 months post Tx
17	34	absent	07/2021	5345	1301	0	0	0	0	210	186	SCID	yes	IL7RA	no	yes	3	-	alive and well, 6 months post Tx
18	37	absent	05/2021	14320	1507	25	15	0	0	0	683	SCID	yes	RAG2	yes	yes	3	-	alive and well
19	term	absent	10/2021	5000	1106	0	0	0	0	560	30	SCID	yes	IL2RG	no	yes	3	-	alive and well, 3 months post Tx
20	39	absent	10/2021	4100	324	70	40	22	30	9	30	SCID	yes	ADA	no	no	-	ERT, GT planned	alive and well
21	41	absent	12/2019	12500	3390	200	50	3	120	2100	370	SCID	no	-	no	yes	3	-	alive and well, 26 months post Tx
22	41	absent	10/2021	12500	530	0	0	0	0	0	480	SCID	yes	RAG1	no	yes	4	-	alive, 2 months post Tx
23	38	absent	12/2021	11800	1580	0	0	0	0	1030	10	SCID	yes	IL2RG	yes	yes	4	-	alive, 2 months post Tx
24	38	absent	04/2021	7680	1360	2	0	0	0	159	4	SCID	yes	IL2RG	no	yes	2	-	alive and well, 2 months post Tx
25	39	absent	01/2022	2930	260	163	124	103	37	11	87	SCID	yes	ADA	no	Planned	4	ERT	alive and well
26	41	low	02/2021	4800	1210	634	459	62	NA	NA	NA	leaky SCID	yes	DCLRE1C	no	yes	4	NA	alive and well, 24 months post Tx
27	41	absent	09/2019	10500	1930	1270	1040	871	208	23	416	leaky SCID	yes	DCLRE1C	yes	no	-	watch&wait	alive and well
28	38	low	08/2020	8800	4580	1739	1190	903	366	1510	824	leaky SCID	yes	FOXN1 (haploinsufficiency)	no	no	-	watch&wait	alive and well
29	39	absent	12/2019	3750	770	840	188	43	59	171	180	leaky SCID	yes	CORO1A	no	yes	5	-	alive and well, 23 months post Tx
30	40	absent	08/2020	2150	1020	1054	585	190	482	62	237	leaky SCID	yes	DCLRE1C	no	yes	4	-	alive and well, 16 months post Tx
31	41	absent	03/2020	8900	1480	399	144	53	246	352	713	leaky SCID	yes	FOXN1	no	no	-	watch&wait	alive and well
32	41	low	06/2021	5480	2154	956	708	390	210	458	509	leaky SCID	yes	FOXN1 (haploinsuffiency)	yes	no	-	watch&wait	alive and well
33	37	absent	08/2020	50300	26659	6931	5332	53	1680	267	19461	Omenn Syndrome	yes	RAG1	yes	no	-	immunosuppression	deceased
34	38	low	11/2019	1000	620	203	167	25	28	395	10	Omenn Syndrome	yes	IL2RB	no	no	-	immunosuppression	deceased					No		--		11/2019
35	38	absent	12/2019	5820	1860	1044	1055	2	37	4	396	Omenn Syndrome	yes	RAG1	No	yes	3	-	alive and well, 23 months post Tx
36	38	absent	07/2020	4200	1331	181	127	43	18	217	381	ITCL	no	-	no	no	-	watch&wait	alive and well
37	term	absent	11/2021	10900	3676	1301	640	435	608	924	592	ITCL	no	-	no	no	-	watch&wait	alive and well
38	38	low	07/2020	3100	1600	930	620	341	270	50	550	ITCL	no	-	no	no	-	watch&wait	alive and well
39	38	low	08/2021	9150	3650	2430	1740	609	310	500	630	ITCL	no	-	no	no	-	watch&wait	alive and well
40	41	absent	01/2021	9200	3300	1096	662	424	319	915	683	RTCL	no	-	no	no	-	watch&wait	alive and well
41	41	low	5/2020	8900	5000	4180	3400	1088	680	340	450	RTCL	no	-	no	no	-	watch&wait	alive and well
42	40	absent	01/2022	12470	2494	1049	627	336	388	178	812	inconclusive	results pending	NA	no	no		watch&wait	alive and well
43	39	absent	09/2016	10690	3528	0	0	0	0	1057	2472	Syndrome	yes	22q11.2	no	no	-	Thymus Tx (2mo)	alive and well
44	34	absent	01/2019	5000	725	96	82	43	13	471	148	Syndrome	yes	CHD7	no	no	-	watch&wait	deceased
45	39	low	04/2020	5200	3089	738	484	332	231	1038	1292	Syndrome	yes	CHD7	no	no	-	watch&wait	alive and well
46	38	absent	07/2020	5000	930	0	0	0	0	410	493	Syndrome	yes	CHD7	no	no	-	Thymus Tx (3mo)	alive and well
47	39	low	04/2020	9590	2630	1088	784	628	NA	NA	NA	Syndrome	yes	22q11.2	no	-	-	-	alive and well
48	35	low	10/2020	15460	3150	1190	1056	735	182	1342	10	Syndrome	yes	22q11.2	no	-	-	NA	NA
49	38	low	08/2021	16020	4680	1435	879	442	NA	NA	NA	Syndrome	no	-	no	no	NA	watch&wait	alive and well
50	37	absent	NA	NA	NA	NA	NA	NA	NA	NA	NA	Syndrome	NA	NA	unknown	NA	NA	watch&wait	deceased
51	40	low	10/2019	7000	3430	1132	926	1231	206	652	549	Syndrome	yes	TP63	no	no	-	watch&wait	alive and well
52	38	low	09/2020	6900	3312	1225	795	612	397	1391	596	Syndrome	yes	22q11.2	no	no	-	watch&wait	alive and well
53	41	low	12/2020	7500	3150	1638	1040	1029	567	536	882	Syndrome	yes	2p11.2 (involving FOXI3)	no	no	-	watch&wait	alive and well
54	term	low	04/2021	7100	3266	1012	719	593	294	849	1372	Syndrome	yes	trisomy of chromosome 21	no	no	-	watch&wait	alive, ongoing cardiological care
55	35	low	10/2021	7200	1224	294	184	150	86	294	514	Syndrome	yes	PTPN11	no	no	-	watch&wait	alive and well
56	term	low	03/2021	8300	1826	694	347	313	329	475	621	Syndrome	yes	22q11.2	no	no	-	watch&wait	alive and well
57	37	absent	10/2019	8260	1070	966	48	122	124	253	379	Syndrome	yes	RMRP	no	yes	2	-	alive and well, 23 months post Tx
58	39	absent	02/2019	13170	3516	1199	784	390	404	981	728	Syndrome	yes	22q11.2	no	no	-	watch&wait	alive and well
59	38	NA	08/2020	10690	2940	1054	741	457	315	1047	312	Syndrome	yes	22q11.2	no	no	-	watch&wait	alive and well
60	39	NA	10/2020	12340	2357	1190	820	531	370	655	174	Syndrome	yes	22q11.2	no	no	-	watch&wait	alive and well
61	37	low	04/2020	17008	3630	1328	1163	891	155	1252	307	Syndrome	yes	EXTL3	no	no	-	watch&wait	alive and well
62	37	absent	03/2020	14000	4800	1408	1083	601	314	1072	538	Syndrome	yes	FOXI3	yes	no	-	watch&wait	alive and well
63	41	absent	10/2020	8690	2003	836	597	359	229	1179	269	Syndrome	yes	22q11.2	no	no	-	watch&wait	deceased
64	41	NA	10/2020	10720	4267	1818	1374	11320	422	1216	640	Syndrome	yes	22q11.2	no	no	-	watch&wait	alive and well
65	35	NA	02/2020	8700	1357	578	147	92	258	574	95	Syndrome	no	-	no	no	-	watch&wait	deceased
66	39	absent	09/2021	5130	1139	145	113	40	8	185	483	Syndrome	yes	RMRP	no	scheduled	5	-	alive and well
67	40	low	03/2020	4600	864	536	325	282	194	50	177	Syndrome	yes	ATM	no	yes	8	-	alive and well (10 months post Tx)
68	39	absent	10/2019	10500	1335	101	80	30	6	730	450	Syndrome	yes	PAX1	no	no	-	Thymus Tx planned	alive and well
69	36	low	01/2021	3388	412	289	228	16	43	45	92	Syndrome	no	PPA2	no	no	-	-	deceased
70	37	absent	03/2021	9500	2300	4	4	0	0	600	1330	Syndrome	yes	22q11.2	no	no	-	Thymus Tx planned	deceased
71	39	low	04/2021	14600	1189	762	501	391	234	140	159	Syndrome	yes	22q11.2	no	no	-	watch&wait	alive and well
72	27	absent	06/2021	15500	3300	336	191	80	52	191	1660	Syndrome	yes	RMRP	no	no	-	watch&wait	alive and well
73	35	absent	10/2021	5300	1362	0	0	0	0	323	338	Syndrome	yes	22q11.2	no	no	-	Thymus Tx (2 mo)	alive and well
74	37	low	12/2021	4500	2178	1169	680	185	381	728	226	Syndrome	yes	22q11.2	no	no	-	watch&wait	alive and well
75	36	absent	01/2022	9000	927	255	247	163	7	462	32	Syndrome	yes	RECQL4	no	no	-	watch&wait	alive and well
76	38	low	06/2020	23000	2000	980	810	324	150	330	730	Syndrome	yes	22q11.2	yes	no	-	watch&wait	alive and well
77	39	absent	09/2020	6340	2500	780	640	179	120	590	540	Syndrome	yes	22q11.2	no	no	-	watch&wait	NA
78	30	absent	09/2021	30000	700	140	90	23	50	120	440	Syndrome	yes	trisomy of chromosome 21	no	no	-	watch&wait	deceased
79	38	absent	10/2021	6810	1120	50	40	2	0	660	440	Syndrome	yes	HOXA3	yes	no	-	Thymus Tx planned	alive and well
80	41	absent	12/2021	5340	1920	830	620	198	190	420	600	Syndrome	yes	22q11.2	no	no	-	watch&wait	alive and well
81	35	absent	10/2020	10450	1600	120	109	0	5	545	229	Syndrome	yes	CHD7	no	no	-	Thymus Tx (5 mo)	alive and well
82	38	absent	08/2021	4370	1780	1390	766	440	59	164	146	Syndrome	yes	22q11.2	no	no	-	watch&wait	alive and well
83	40	low	01/2021	7140	2799	1240	862	797	299	362	555	Syndrome	yes	22q11.2	no	no	-	watch&wait	alive and well
84	38	absent	01/2020	8400	168	8	5	3	2	4	44	Syndrome	yes	trisomy of chromosome 21	no	no	-	watch&wait	alive and well
85	31	absent	02/2021	13120	170	27	26	5	3	75	480	Syndrome	yes	SGPL1	no	no	-	palliative care	deceased
86	41	low	02/21	16000	4200	969	878	548	80	2735	428	Syndrome	yes	NRAS	no	no	-	watch&wait	alive and well
87	40	low	05/2021	6550	3349	1101	807	605	313	1049	1084	Syndrome	yes	TBX1	no	no	-	watch&wait	alive and well
88	41	low	12/2021	12800	2091	722	571	450	184	671	560	Syndrome	yes	22q11.2	no	no	-	watch&wait	alive and well
